# Supplementary material for: Seasonal differences in observed versus modeled new particle formation over boreal regions
Source: Copernicus journal article supplement (doi:10.5194/egusphere-2024-3626), 2024-12-12
Supplement: Supplementary file [file egusphere-2024-3626-AC2-supplement.pdf]

# Author Response to Christina Williamson

We thank the reviewers for their thorough and constructive comments, which have helped to improve the quality and clarity of our manuscript. We have carefully considered all suggestions and made corresponding revisions in the manuscript. Below, we provide detailed responses to each comment, with changes clearly indicated in the revised version of the manuscript.

Reviewer comments are reproduced in **bold**, and our responses follow each comment in **plain text**. Line numbers refer to the revised manuscript unless otherwise stated.

- Start of CJW Comments: -

**My review here below is formatted as direct answers to the questions posed for consideration in ACPs review criteria.**

- **Does the paper address relevant scientific questions within the scope of ACP?**

**This paper addresses the questions of how to represent aerosol nucleation and growth in global models, and how to evaluate these representations, both of which are within the scope of ACP.**

- **Does the paper present novel concepts, ideas, tools, or data?**

**The paper presents novel model outputs to compare with field observations, as well as a novel evaluation of EC-Earth3 using both observations and a more complex chemical model. In particular, this study's use of both observations and detailed chemistry process model to understand why EC-Earth and observations differ, and to check things are "right for the right reasons" is very valuable.**

- **Are substantial conclusions reached?**

**Substantial conclusions are reached regarding the need to include ammonia nucleation mechanisms in EC-Earth3 to better represent nucleation and growth in European boreal forest, and the necessity of evaluating seasonal and even hourly outputs to properly assess model representations of aerosol nucleation and growth.**

**Are the scientific methods and assumptions valid and clearly outlined?**

**While much of the method used and most of the assumptions made are valid and clearly outlined, some of the assumptions do not seem valid or well justified. I will detail the areas I consider problematic in this respect here below:**

**The introduction refers to Hyytiälä and Hyltemossa stations as "not heavily impacted by anthropogenic influence" (line 76-81) but then goes on to discuss higher levels of NH<sub>3</sub> and H<sub>2</sub>SO<sub>4</sub> at Hyltemossa due to anthropogenic activity. This suggests that at least the Swedish station is influenced by anthropogenic activity. We are also aware of anthropogenic activity influencing NPF at the Finnish station, through the presence of NH<sub>3</sub> and elevated H<sub>2</sub>SO<sub>4</sub>. Since NPF mechanisms and growth of small particles are sensitive to small concentrations of NH<sub>3</sub> for example, we cannot justify these as representative natural sites. This does not**

**invalidate the methodology, but greater care should be taken to present the conditions of these measurement sites and not try to present them as representative of the broader northern midlatitude region. Also, this study specifically addresses NH<sub>3</sub> NPF, so if the sites were not anthropogenically influence this would be a problem since we would not expect any influence of NH<sub>3</sub> in that case.**

We agree that both Hyytiälä and Hyltemossa experience varying degrees of anthropogenic influence, and it is not accurate to characterize them as purely “natural” or free from such effects. We have therefore revised the wording in the Introduction to more accurately reflect the conditions at these sites. The updated sentence now reads: “The surrounding area is primarily spruce forest, with some anthropogenic and agricultural influences, particularly near the southern station.” We also now clarify in the text that the sites are not intended to serve as broad representative of all northern midlatitude environments, but are instead a depiction of forested regions with both biogenic and anthropogenic inputs.

**This problem of representativeness appears again in the conclusions ( line 355). Text states that CLUST mechanism accounts for more NPF between 100m altitude and upper troposphere “especially to northern mid-latitudes”. Firstly, since only data and modelling were presented for northern mid-latitudes, it is not justified to imply these results are applicable elsewhere. Secondly, it is not justified that the 2 presented site are typical for northern mid-latitudes. Indeed, when we consider that the major conclusion is the need to include ammonia nucleation and growth at the 2 sites presented, we see that we are dealing with anthropogenic influence that would likely not apply to the same extent when considering boreal forest sites in north America. The EVOC representation from Riccobono may be more applicable to the emissions from European boreal forest than north American or Siberian boreal forest, and then of course there are marine regions in northern mid latitudes as well.**

That is a good point regarding the representativeness of our study sites and the scope of our conclusions. We agree that it is not appropriate to imply broader applicability beyond the specific conditions of the two sites presented, particularly given the known variability in emissions and anthropogenic influence across different northern mid-latitude regions. In response, we have revised the text in the Conclusions (and the title) to more accurately reflect the scope of our findings. The sentence now reads: “Our new CLUST nucleation mechanism accounts for more NPF in these regions for the two boreal European mid-latitude stations”. This adjustment, along with the earlier clarification in the Introduction, aims to more accurately deliver the limitations of spatial representativeness, but maintaining the relevance of the findings within the scope of the study.

- **Are the results sufficient to support the interpretations and conclusions?**

**While the major conclusion that including ammonia nucleation mechanisms at the sites investigated brings model aerosol size distributions closer to observed values in spring and summer, a number of the finer points appear either not completely supported by the data presented, or the data is presented in such a way that it is not possible to tell if it supports the conclusions reach. I will detail the problems I came across here below. While I refer to parts of the text using quotation marks, I mostly only paraphrase the text for brevity.**

**Line 226: low availability of condensable vapours postulated to explain low EC-Earth number concentrations but then shown to be not the case because ADCHEM can produce sufficient number with same condensable vapour concentrations. So why leave this in as a possible explanation? Isn't the benefit of including ADCHEM to be able to show that this is the mechanisms not the vapour concentrations that are the problem?**

The results from ADCHEM and EC-Earth3 suggest that there could be insufficient mechanisms in EC-Earth3 regarding organic gas-phase chemistry, which is better represented in ADCHEM. We suggest this could generate more condensable vapors as we see more organic aerosol mass and PNSD in ADCHEM compared to ECE3 during the summer months (shown in Fig. A4).

**Line 245: decrease in J for control case explained by decreasing ELVOC concentrations with altitude (fig 2a), which makes sense. But NH3 concentrations also decrease with altitude (fig 2c) and CLUST Js do not show the same decrease with altitude. A more nuanced discussion of the changes in J with altitude for the different mechanisms is needed here.**

Yes, this part of our results we find interesting, and the authors have included further clarifying words on Line 247: “In contrast, the CLUST nucleation rate remains unaffected by altitude. Since CLUST formation depends on temperature, ionization, and cluster scavenging sinks, higher altitudes provide more favorable conditions for nucleation in CLUST (Svenhag et al. 2024). However, this advantage is likely counterbalanced by the decreasing NH3 concentrations with altitude, which is why the formation rate remains fairly unchanged vertically.”

**Fig 3 line 259: “ADCHEM better reproduces observations than EC-Earth3” – Hyytiälä ADCHEM appears to see no aerosols at all. Could this just be a plotting error?**

The authors have added a textbox in the figures where ADCHEM has this to clarify the “no-data”.

**Line 265-268: It is unclear why the lower Aitken mode concentrations in the control case are ascribed to the weakness of the nucleation, but the lower Aitken mode concentrations in the CLUST cases are ascribed to limitations in how aerosols grow between modes in the model.**

This is true, we have changed the phrasing and including reference to the new figure (Fig. A8, addressed further down in our comments), this now read as:

“Nonetheless, regarding the resulting total concentration in the nucleation and Aitken mode, it agrees better with observations when using the CLUST scheme compared to using only the default ELVOC–H2SO4 nucleation. Comparing the modelled “No NPF” case with the Control case for Hyytiälä in Fig. 3 (left panel) the weak visible nucleation in the control case gives almost no growth to the Aitken mode as the two cases have the same number size distributions shown in Fig. A8 a.”

The part before this paragraph is referring to the limitations in the modal structure and growth mechanic and how aerosols are moved between modes in the model for the CLUST, and the control case, (which is included when referencing: “modelled by EC-Earth3”, on Line 270). This paragraph above is referring to the “total number concentration” where the weak visible nucleation in the control case” in the following sentence is ascribed to the nucleation mechanic and subsequent weak/no growth.

**Line 276: “fig 4k ELVOCs are low on April 6th Hytlemossa” – figure shows very similar ELVOC concentrations to all other days, what do the authors mean by low here?**

This was slightly unclear yes, the authors have added a reference to Fig A6 (previously Fig. A5), emphasizing the ELVOC conc. is low during this week in reference to the entire spring perspective shown in Fig. A6. Line now reads as: “ELVOC concentrations are lower during this earlier period of spring (Fig. A6)”.

**Line 277: “April 6th Hytlemossa NH3 in fig 4 low compared with spring average shown in fig A5” this is very hard to see since the scale on fig A5 makes it hard to pick out where April 6th is and it requires going between two very separate figures. Suggest either marking April 6th clearly on fig A5, adding an average line on fig 4, or some other combining of the figures.**

The authors have made changes to figure A4 and figure A5 (now A5 and A6) to highlight the specific weeks. Additionally, the sentence was adjusted, and now reads as: “Additionally, ELVOC concentrations are lower at this earlier period of spring, shown in Fig. A5.”

**Line 283: “H2SO4 generally higher in model level 2 than model level 1 in fig 4” – H2SO4 seems almost identical in both levels. Either a clearer figure is needed to show this is the case, or there is some error in interpretation here.**

The authors have clarified the sentence and explicitly shown with a new figure (Fig. A1): “On average, the H2SO4 concentrations are higher in the second model layer compared to the surface layer (shown in Fig A1 b).”

**Line 296: “High ELVOC-H2SO4 nucleation during the 2 week periods for both stations shown in figure 6 yield lower surface aerosol concentrations compared to NH3 nucleation as shown in figure 1” – figure 1 only shows seasonal averages, so I don’t see how conclusions can be drawn by comparing nucleation rates from specific 2 week periods to number concentrations in the seasonal averages. Could the resulting number concentrations from the days shown in fig 6 not be included to make a robust conclusion here?**

The authors have added Fig. A8 showing the median PNSD of the six different studied weeks and now reads: “Despite the higher surface formation rates for ELVOC-H2SO4 nucleation during these days, this case still yields a lower total surface aerosol number concentration compared to the CLUST-High case, shown in Fig. A8 b, e.”

**Line 299: “J is higher in second model layer than surface layer in fig 2” Figure 2 does not indicate where these model layers are and I suspect that both surface and 1st model layer are so close together at the bottom of this figure as to make it hard to see the changes. A clearer figure would be needed to justify this conclusion.**

This is a valid point concerning the figures, the authors have included a supplementary figure to show the surface-lower troposphere vertical distribution in Fig. A1 and added line 251 in the result section: “In Fig. A1 d the difference in gas concentrations and particle formation rates are shown at a lower altitude interval (800 hPa - 1000 hPa).” Also the mentioned Line 299 now refers to the 800-1000 hPa vertical figure (Fig. A1) instead as: “J is higher in second model layer than surface layer in fig A1”

**Line 304: why especially above 100m? Fig A2 shows  $J > 1e-3$  below 100 m also.**

The authors have removed the end of the sentence: “especially above 100 m”.

**Line 308 suggests uncertainties on atmospheric concentrations of amines and iodine greater than those of ammonia, ELVOCs and H<sub>2</sub>SO<sub>4</sub>, but no sources cited to justify this claim. Considering we lack ammonia observations for most of the atmosphere, and large areas without many observations of H<sub>2</sub>SO<sub>4</sub> and ELVOCs I’m not convinced this is the case.**

The authors have clarified this sentence and now reads as: “Studies have suggested the potential importance of amines and iodine for enhancing nucleation (Wollesen et al., 2024; Zhao et al., 2024), which are pathways not included in the EC-Earth3 model.”

**Conclusion line 356 states that CLUST nucleation mechanism agrees with detailed modelling in ADCHEM; but most of the results presented show that the CLUST nucleation schemes produce less nucleation and growth than ADCHEM and the observations at the 2 sites. The conclusions here also state that CLUST nucleation mechanism agrees with results of Zhao et al. (2024), but no comparison with nucleation rates from Zhao et al (2024) was presented in the manuscript, unless I have missed something?**

We agree that many points from Zhao et al. (2024) could be explored, the authors have clarified the line by the following 2 sentences to Line 311 as: Fig. 4 in Zhao et al. (2024) also shows NH<sub>3</sub>–H<sub>2</sub>SO<sub>4</sub> nucleation (neutral and ion-induced) as a key contributing pathway to particle formation in the upper and lower troposphere.”, and Line 365 as: “Our new CLUST nucleation mechanism accounts for more NPF in this vertical region in the two northern mid-latitude stations, which has better agreement with detailed modelling in ADCHEM and NPF rates presented in Zhao et al. 2024).”

**Fig 3: ADCHEM seems to have nucleation when none is observed for Hyltemossa – this is not addressed. EC-Earth3 Hyltemossa seems to see some nucleation for all 3 observed events with all model variants, just less intense and without growth. This is not mentioned in the discussion.**

That is a good point regarding ADCHEM’s performance, the authors have clarified the suggested events, and sentence now reads as: “The three events in April are captured, but underestimated in intensity and growth, with a continuously high NUS concentration throughout the day during April 6th.”. The authors acknowledge there might be some bias NPF estimations in ADCHEM, it was mentioned shortly on Line 278 as: “but still show some deficiencies.” A more detailed ADCHEM performance evaluation could indeed be beneficial but is not made in this study.

- **Is the description of experiments and calculations sufficiently complete and precise to allow their reproduction by fellow scientists (traceability of results)?**

**Yes**

- **Do the authors give proper credit to related work and clearly indicate their own new/original contribution?**

**Yes.**

- **Does the title clearly reflect the contents of the paper?**

The title only partially reflects the content of the paper. It makes no mention of the use of a complex chemistry model to improve comparison between the global model and the observations, fails to indicate that this paper is specifically addressing the role of ammonia nucleation, and refers to “boreal forests” generally, when the paper only deals with European boreal forest sites.

- **Does the abstract provide a concise and complete summary?**

Yes, the abstract provides a very clear summary of the work.

- **Is the overall presentation well structured and clear?**

In general, the authors ask the reader to jump between figures a lot to support the scientific conclusions they are drawing, and the figures are not laid out in ways to make it easy to compare between them. This is a problem for readability and makes it hard, as a reviewer, to see if the data presented really support the conclusions drawn.

- **Is the language fluent and precise?**

There are several small instances where use of language, or spelling or grammatical errors hinder readability of the paper. The ones I’ve noted are as follows:

**Line 231: is this saying that the CLUST higher Aitken mode concentrations are due to transport either from above or from neighbouring grid boxes? This could be more clearly stated.**

The authors have clarified this paragraph, and now reads: “However, the CLUST cases still have greater Aitken-mode aerosol number concentrations at the surface due to transport. As CLUST have substantially greater aerosol formation rates in the overlying grids (or possibly in neighboring grids) and these additional aerosols can then descend (or move laterally) to the surface grid representing the station”

**Line 246 and fig A1: “CLUST schemes produce highest J in spring and autumn at high altitude” - unclear. do the authors mean that in spring and autumn at high altitude the CLUST Js are higher than control, or that in spring and autumn the high altitude Js from CLUST are higher than low altitude Js from CLUST, or that high altitude Js from CLUST are higher in spring and autumn than summer and winter? Either way it is quite hard to see this from the image plots, and without knowing what the authors classify as high altitude – UTLS? Above the BL? - perhaps time series of overage J within altitude bins might be clearer? Along with more precise text.**

The authors have clarified this paragraph with more precise wording, it now reads as: “The largest case differences here between CLUST and the control case are found at altitudes between 800-400 hPa. There are occasions when the formation rates for the Control case are occurring at altitudes between 800–400 hPa, but these rates are almost entirely produced by the

model from only BHN of water-H<sub>2</sub>SO<sub>4</sub>. During summer, nucleation throughout the troposphere seems to substantially decrease for all cases.”

**Line 249-251: unclear – I’m not at all sure what is meant here**

The authors selected to remove this sentence describing the similarities to the global average, as it does not meaningfully contribute to the discussion or evaluation of the results.

**Line 277: “this variation in event strength is similar to autumn cases”. It is unclear what the authors means by variation in event strength since the text is talking about a single event (April 6th).**

The authors have adjusted this Line to: “A similarly strong NPF event is captured by EC-Earth3 at Hyltemossa on the 24th of October where the resulting aerosol and H<sub>2</sub>SO<sub>4</sub> concentrations again vary between cases (shown in Fig. A6 and Fig. A7).”

**Very minor, but noted here in-case it is helpful to the authors:**

**Line 16: particular – particulate**

Authors have adjusted this error.

**Line 162: utilized -> used (clarity of language)**

Authors adjusted “utilized” to “used”.

**Line 163: spurious comma after “and NPF”**

Authors have removed this comma.

**Fig 5 caption: spelling mistake**

Authors have adjusted this error.

**Are mathematical formulae, symbols, abbreviations, and units correctly defined and used?**

**Generally yes, but there are some instances where clarity could be improved that I note here below.**

**Line 140: RICC method and DLPNO method acronyms and methods not fully explained – hard to understand the difference between the 2 datasets here**

The authors have clarified the two method versions as: “The RICC2 version method is based on Olenius et al. (2013) and the newer DLPNO version is based on Besel et al. (2020). Further details on the EC-Earth3 implemented look-up table is described in Svenhag et al. (2024).

**Line 142: do HIGH and LOW inputs mentioned here refer to CLUST-High and CLUST-low mentioned above? The change in terminology is confusing.**

The authors have clarified this in the text, now reads as: “The RICC2 (CLUST-High) version method is based on Olenius et al. (2013) and the newer DLPNO (CLUST-Low) version is based on

Besel et al. (2020b). Further details on the EC-Earth3 implemented look-up table is described in Svenhag et al. (2024). We study the ranges produced from the CLUST-High and CLUST-Low inputs, for assessing the model sensitivity to ammonia.”

- **Should any parts of the paper (text, formulae, figures, tables) be clarified, reduced, combined, or eliminated?**

There are a number of instances where either the text, figures or tables were unclear. I detail those I found here below:

In general the language used to refer to the different nucleation schemes could be clearer. Once I had read enough of the manuscript I understood that base = binary + Riccobono, CLUST = binary +  $\text{NH}_3$  ternary, and then Clust+Riccobono is binary +  $\text{NH}_3$  ternary + Riccobono, but this could be made clearer in table 1, and earlier in the text.

**Table 1: fuller description of the difference between the nucleation schemes would be helpful here. It is hard as a reader who isn't intimately familiar with Svenhag 2024 to understand from the text and this table the differences between the different model runs**

This is a very valid point, we have now extended the information described within Table 1 to include every involved NPF mechanism and the corresponding species.

**Fig 1: very difficult to see what is going on in nucleation mode because of dominance of accumulation mode. Can't see ADCHEM line for Hyytiälä except for in summer.**

Yes, it is unfortunate that some parts of nucleation and accumulation mode are not visible. But using a log-scale would remove the visible differences in the Aitken mode, which have the highest median divergence between the model cases. For ADCHEM not being visible at Hyytiälä except in summer: we give this description in the caption: “Note, the ADCHEM model only generated output from May to August for Hyytiälä and thus is only shown for Jun-Aug.”

**Table A1 and line 233-237: The CRE change from CLUST High in summer for Hyltemossa is also very large and not mentioned, and strange that for the same period and simulation the change for Hyytiälä is 0. The authors are correct to point out the problem of looking only locally at CRE and DRE changes when advection and transport play such a role. The very limited discussion presented here however raises more questions than it answers. Either a more thorough discussion is warranted, or the CRE and DRE discussion should be omitted from this paper altogether (another paper by the same author is referenced – so perhaps it is not necessary to include that analysis here also).**

After consideration, the authors also agree with this point. This table was intended to be displayed in comparison to Svenhag et al. (2024) and does not directly contribute to the discussion of what is studied in this paper. We have decided to omit this table and the short paragraph description in the result section.

**Line 240 and fig 2: ELVOC- $\text{H}_2\text{SO}_4$  and  $\text{NH}_3$ - $\text{H}_2\text{SO}_4$  don't directly relate to how the mechanisms are named in the legend, so harder for the reader to quickly relate text to plot. It would help to remind that the first is called “control” and the second is both of the “CLUST” cases. It would help to relate the second model layer to a pressure since that is the vertical axis of the graph. Or even to put a line on the graph indicating where the 2nd**



**model layer starts. Also it is not clear from the figure that the CLUST cases and control case are similar at altitudes below 100m, which is implied in the text.**

These are good points. The referenced height and model cases were indeed not clear in context with the figure, so the authors changed this line to read as: “(approx. at 900 hPa and above) when comparing the control case (ELVOC-H<sub>2</sub>SO<sub>4</sub>) and CLUST cases (NH<sub>3</sub>-H<sub>2</sub>SO<sub>4</sub>)”. We have addressed the “invisible” 2nd model layer by adding another figure where we only show (zoomed in) 1000-800 hPa vertical distribution of Figure 2 with each layer is assigned a marker.

**Fig 3 and 4: would be helpful to have these on same x-axis for direct comparison**

The authors agree with this and have merged figures of the weekly studied cases. Now Fig 3 and 4 is one larger figure, similarly for the summer and autumn case-figures.

**Fig 4: what are the dashed lines in e,k,f,l? also e and k show hints of lines in multiple colors but the legend says these are only the no NPF case, so then what are the other colors for?**

Thank you for noting this, In this caption the: “The ELVOC and NH<sub>3</sub> concentrations are from the No-NPF case”, is not true and is removed, and we further added an explanation in the caption to what the dashed lines indicate as: “The concentrations for ELVOC and NH<sub>3</sub> level 2 are shown as dotted lines in e, f, k, l.”

- **Are the number and quality of references appropriate?**

**In general, yes.**

**There was one instance in the introduction where the availability of vertical profiles of aerosol properties seemed to be understated and the relevant references missed. This is at line 70-75, which mentions a “lack of vertical profiles” and “aerial campaign measurements are not yet sufficient” for sub-100nm aerosol observations. While I believe there may not be vertical profiles made directly over both stations considered here, some airborne observations have been made over Hyytiälä and campaigns over other regions have made a substantial number of vertical profiles from aircraft e.g. such as ATom, Café-Brazil etc. The state of the field would be better represented if reference were made to these, although they are may not help directly with the analysis presented here.**

The authors agree with this point, we have included a short mention of the availability of aerial campaigns on Line 71. As: “Some aeronautical measurement campaigns from e.g. ATom (Brock et al., 2019) and CAFE-Brazil (Curtis et al., 2024) at various locations have made efforts to capture this, but they are not evaluated in this study.” With the following 2 references:

*Brock, C. A., Williamson, C., Kupc, A., Froyd, K. D., Erdesz, F., Wagner, N., Richardson, M., Schwarz, J. P., Gao, R.-S., Katich, J. M., Campuzano-Jost, P., Nault, B. A., Schroder, J. C., Jimenez, J. L., Weinzierl, B., Dollner, M., Bui, T., and Murphy, D. M.: Aerosol size distributions during the Atmospheric Tomography Mission (ATom): methods, uncertainties, and data products, Atmospheric Measurement Techniques, 12, 3081–3099, <https://doi.org/10.5194/amt-12-3081-2019>, 2019.*

*Curtis, J., Heinritzi, M., Beck, L. J., Pöhlker, M. L., Tripathi, N., Krumm, B. E., Holzbeck, P., Nussbaumer, C. M., Hernández Pardo, L., Klimach, T., Barmounis, K., Andersen, S. T., Bardakov, R., Bohn, B., Cecchini, M. A., Chaboureau, J.-P., Dauhut, T., Dienhart, D., Dörich, R., Edtbauer, A., Giez, A., Hartmann, A., Holanda, B. A., Joppe, P., Kaiser, K., Keber, T., Klebach, H., Krüger, O. O., Kürten, A., Mallaun, C., Marno, D., Martinez, M., Monteiro, C., Nelson, C., Ort, L., Raj, S. S.,*

*Richter, S., Ringsdorf, A., Rocha, F., Simon, M., Sreekumar, S., Tsokankunku, A., Unfer, G. R., Valenti, I. D., Wang, N., Zahn, A., Zauner-Wieczorek, M., Albrecht, R. I., Andreae, M. O., Artaxo, P., Crowley, J. N., Fischer, H., Harder, H., Herdies, D. L., Machado, L. A. T., Pöhlker, C., Pöschl, U., Possner, A., Pozzer, A., Schneider, J., Williams, J., and Lelieveld, J.: Isoprene nitrates drive new particle formation in Amazon's upper troposphere, *Nature*, 636, 124–130, <https://doi.org/10.1038/s41586-024-08192-4>, 2024.*

- **Is the amount and quality of supplementary material appropriate?**

**The reader is asked frequently to refer to supplementary figures to justify major conclusions in the main text. It might improve readability if more of the relevant parts from supplementary figures were combined with the relevant figures in the main text.**

**I have mentioned above a number of areas where conclusions drawn do not seem to be fully supported by the data presented. It may therefore be necessary to include further supplementary material, but in my opinion, the paper might instead benefit from changes to the main figures presented and a re-evaluation of some of the conclusions drawn.**

We thank the reviewer for all this valuable feedback. We appreciate the observations that some conclusions may not have been fully supported by the data as originally presented. In response, we have re-evaluated the relevant sections of the manuscript from all the above comments and points and have taken the following steps to strengthen the support for our conclusions.
